# Supplementary material for: Au/NiFe2O4 nanoparticle-decorated graphene oxide nanosheets for electrochemical immunosensing of amyloid beta peptide
Source: Royal Society of Chemistry journal article supplement (doi:10.1039/c9na00578a), 2019-11-05
Supplement: c9na00578a1.pdf [file c9na00578a1.pdf]

**Electronic Supplementary Information**

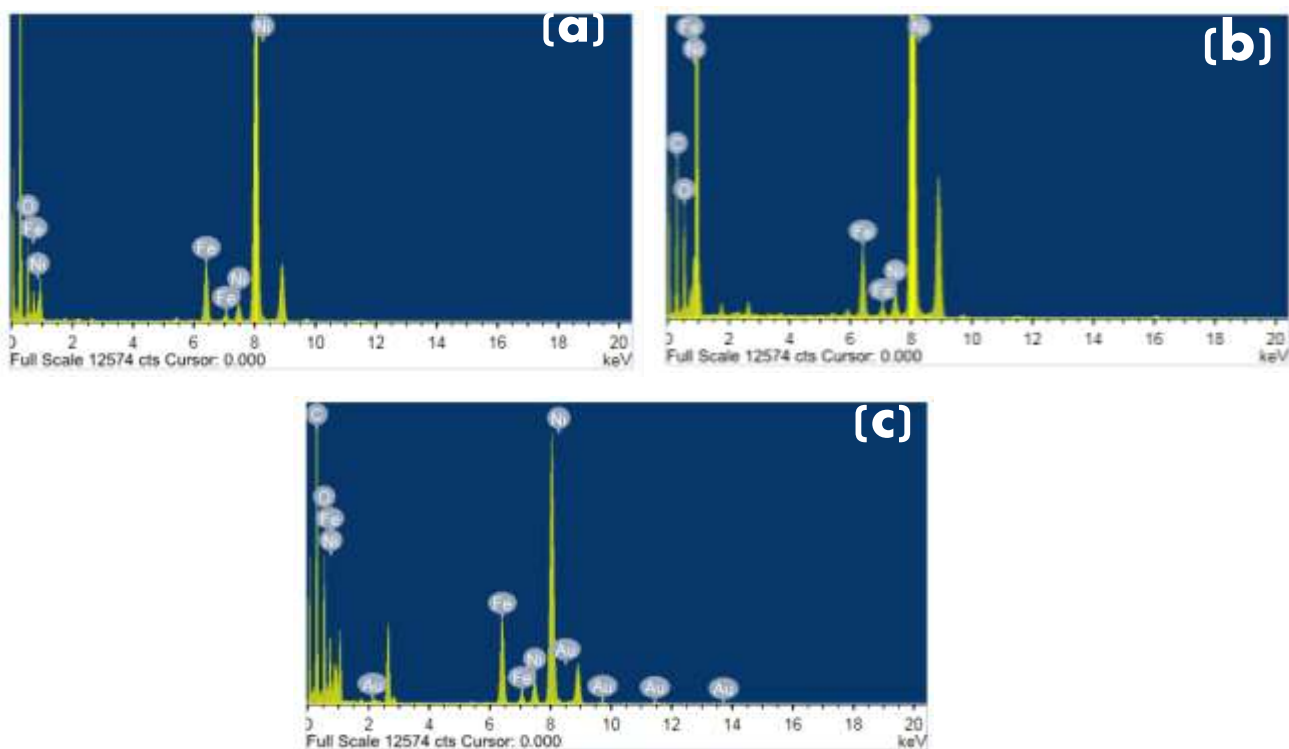

**Figure S1:** EDX spectra of (a) NiFe<sub>2</sub>O<sub>4</sub> (b) NiFe<sub>2</sub>O<sub>4</sub>@GO-Ch (c) Au/NiFe<sub>2</sub>O<sub>4</sub>@GO-Ch

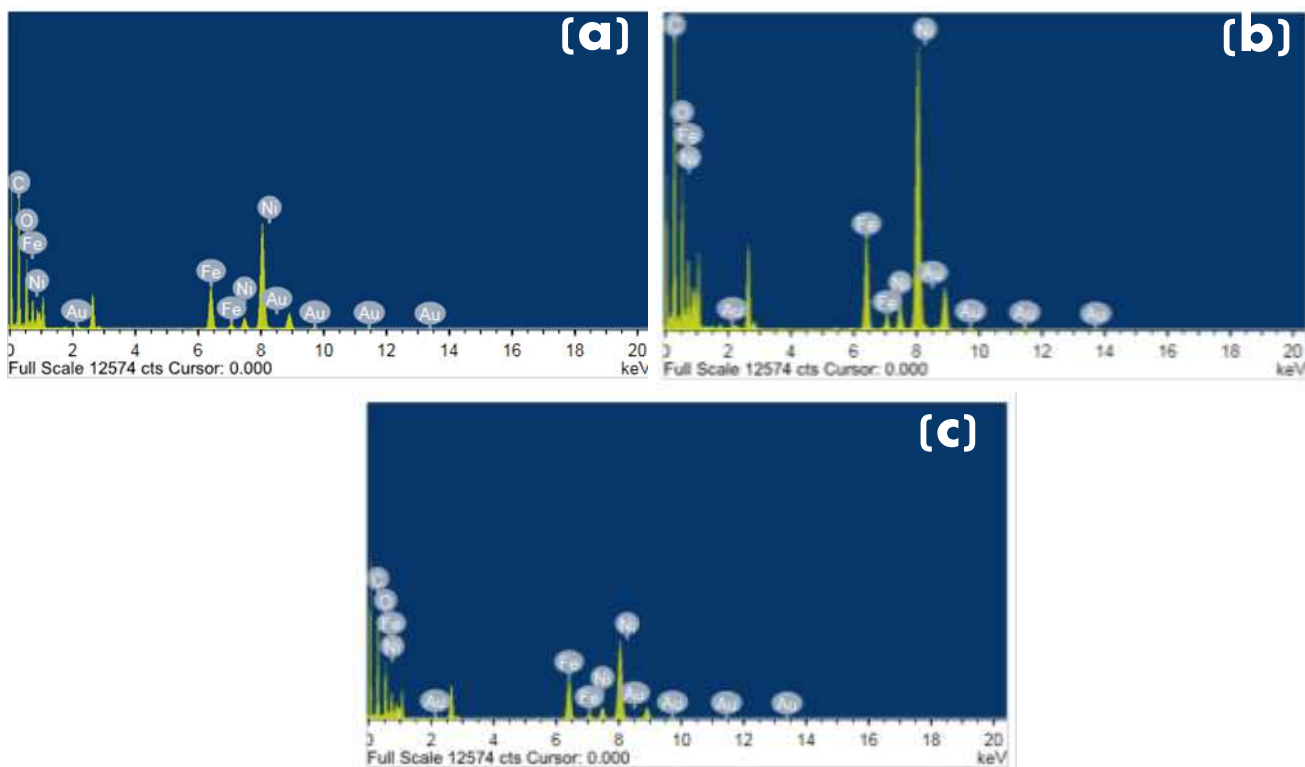

**Figure S2:** (a), (b), (c) EDX spectra of Au/NiFe<sub>2</sub>O<sub>4</sub>@GO-Ch nanocomposite at three different areas

**Table S1:** Weight percentage of each constituent elements of Au/NiFe<sub>2</sub>O<sub>4</sub>@GO-Ch nanocomposite at three different areas

| Elements | Weight% |       |       |
|----------|---------|-------|-------|
|          | (a)     | (b)   | (c)   |
| C        | 50.64   | 52.96 | 49.13 |
| O        | 21.27   | 19.50 | 20.54 |
| Ni       | 5.45    | 5.03  | 5.92  |
| Fe       | 19.64   | 19.50 | 21.03 |
| Au       | 3.00    | 3.01  | 3.38  |

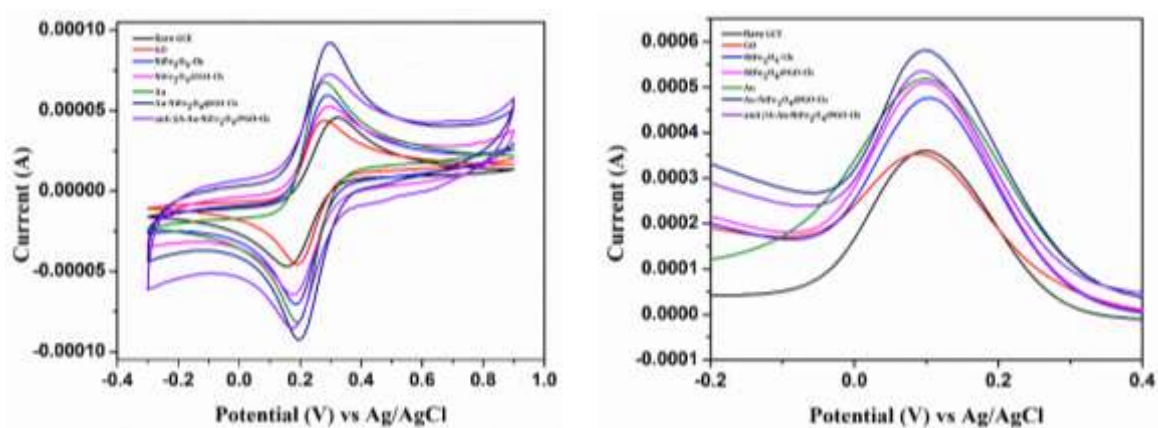

**Figure S3:** CV and DPV of individual/synergistic components of the Au/NiFe<sub>2</sub>O<sub>4</sub>@GO-Ch nanocomposite
